# Supplementary material for: Two unusual 3D honeycomb networks based on Wells–Dawson arsenomolybdates with d10transition-metal-pyrazole connectors
Source: Royal Society of Chemistry journal article supplement (doi:10.1039/c7dt01240c), 2017-01-01
Supplement: c7dt01240c1.pdf [file c7dt01240c1.pdf]

Supplementary Material (ESI) for Dalton Transactions  
This journal is © The Royal Society of Chemistry

## Two Unusual 3D Honeycomb Network Based on Wells-Dawson Arsenomolybdates with d<sup>10</sup> Transition-Metal-Pyrazole Connectors

Bo-Wen Cong,<sup>[a]</sup> Zhan-Hua Su,<sup>\* [a]</sup> Bao-Yi Yu,<sup>[c]</sup> Wen-Qi Zhao,<sup>[a]</sup> Xiu-Juan Ma,<sup>[a]</sup> and Zhi-Feng Zhao,<sup>\*[b]</sup>

<sup>a</sup>Key Laboratory of Synthesis of Functional Materials and Green Catalysis, Colleges of Heilongjiang

Province, Harbin Normal University, Harbin 150025, China

<sup>b</sup>College of Material Science and Engineering, University of Science and Technology Heilongjiang, Harbin

150022, China

<sup>c</sup>Beijing University of Agriculture, 102206, China

Table S1 Selected bond lengths (Å) and bond angles (°) of compounds 1 and 2

| Compound 1          |            |                     |            |                     |            |
|---------------------|------------|---------------------|------------|---------------------|------------|
| Mo(1)-O(1)          | 1.686(5)   | Mo(1)-O(3)          | 1.822(4)   | Mo(1)-O(4)          | 1.923(4)   |
| Mo(1)-O(2)#1        | 1.943(5)   | Mo(1)-O(2)          | 2.038(5)   | Mo(1)-O(5)          | 2.360(4)   |
| Mo(2)-O(6)          | 1.653(5)   | Mo(2)-O(9)          | 1.787(9)   | Mo(2)-O(11)#1       | 1.810(9)   |
| Mo(2)-O(4)          | 1.953(4)   | Mo(2)-O(7)          | 1.967(5)   | Mo(2)-O(11A)#1      | 2.007(9)   |
| Mo(2)-O(9A)         | 2.021(9)   | Mo(2)-O(10A)#1      | 2.317(8)   | Mo(2)-O(10)         | 2.367(8)   |
| Mo(3)-O(8)          | 1.668(5)   | Mo(3)-O(11)         | 1.795(8)   | Mo(3)-O(9)          | 1.797(9)   |
| Mo(3)-O(7)#2        | 1.835(5)   | Mo(3)-O(9A)         | 2.028(9)   | Mo(3)-O(11A)        | 2.057(9)   |
| Mo(3)-O(3)#3        | 2.083(4)   | Mo(3)-O(10A)        | 2.290(8)   | Mo(3)-O(10)         | 2.325(8)   |
| As(1)-O(10A)#3      | 1.682(9)   | As(1)-O(10A)#1      | 1.682(9)   | As(1)-O(10A)        | 1.682(9)   |
| As(1)-O(10)#3       | 1.706(8)   | As(1)-O(10)#1       | 1.706(8)   | As(1)-O(10)         | 1.706(8)   |
| As(1)-O(5)          | 1.722(7)   | O(2)-Mo(1)#3        | 1.943(5)   | O(3)-Mo(3)#1        | 2.083(4)   |
| O(5)-Mo(1)#3        | 2.360(4)   | O(5)-Mo(1)#1        | 2.360(4)   | O(7)-Mo(3)#4        | 1.835(5)   |
| O(10A)-Mo(2)#3      | 2.317(7)   | O(11)-Mo(2)#3       | 1.810(9)   | O(11A)-Mo(2)#3      | 2.007(9)   |
| Cu(1)-N(1)#5        | 1.879(7)   | Cu(1)-N(1)          | 1.879(7)   | Cu(1)-O(9A)         | 2.598(1)   |
| Cu(2)-O(8)          | 2.612(1)   |                     |            |                     |            |
| O(1)-Mo(1)-O(3)     | 104.0(2)   | O(1)-Mo(1)-O(4)     | 102.9(2)   | O(3)-Mo(1)-O(4)     | 89.64(19)  |
| O(1)-Mo(1)-O(2)#1   | 99.3(2)    | O(3)-Mo(1)-O(2)#1   | 92.6(2)    | O(4)-Mo(1)-O(2)#1   | 156.44(19) |
| O(1)-Mo(1)-O(2)     | 97.5(2)    | O(3)-Mo(1)-O(2)     | 158.50(19) | O(4)-Mo(1)-O(2)     | 84.55(18)  |
| O(2)#1-Mo(1)-O(2)   | 84.8(3)    | O(1)-Mo(1)-O(5)     | 167.1(2)   | O(3)-Mo(1)-O(5)     | 87.12(18)  |
| O(4)-Mo(1)-O(5)     | 83.47(16)  | O(2)#1-Mo(1)-O(5)   | 73.24(16)  | O(2)-Mo(1)-O(5)     | 71.68(16)  |
| O(6)-Mo(2)-O(9)     | 112.3(4)   | O(6)-Mo(2)-O(11)#1  | 116.2(4)   | O(9)-Mo(2)-O(11)#1  | 130.7(5)   |
| O(6)-Mo(2)-O(4)     | 98.5(2)    | O(9)-Mo(2)-O(4)     | 89.5(3)    | O(11)#1-Mo(2)-O(4)  | 91.3(3)    |
| O(6)-Mo(2)-O(7)     | 95.9(2)    | O(9)-Mo(2)-O(7)     | 87.5(3)    | O(11)#1-Mo(2)-O(7)  | 79.9(3)    |
| O(4)-Mo(2)-O(7)     | 165.33(19) | O(6)-Mo(2)-O(11A)#1 | 91.3(3)    | O(9)-Mo(2)-O(11A)#1 | 155.9(4)   |
| O(4)-Mo(2)-O(11A)#1 | 82.2(3)    | O(7)-Mo(2)-O(11A)#1 | 94.8(3)    | O(6)-Mo(2)-O(9A)    | 89.3(3)    |

**Supplementary Material (ESI) for Dalton Transactions**  
**This journal is © The Royal Society of Chemistry**

|                       |          |                      |            |                      |          |
|-----------------------|----------|----------------------|------------|----------------------|----------|
| O(11)#1-Mo(2)-O(9A)   | 153.7(4) | O(4)-Mo(2)-O(9A)     | 90.7(3)    | O(11A)#1-Mo(2)-O(9A) | 172.9(3) |
| O(6)-Mo(2)-O(10A)#1   | 161.6(3) | O(9A)-Mo(2)-O(10A)#1 | 109.0(3)   | O(6)-Mo(2)-O(10)     | 157.4(3) |
| O(11)#1-Mo(2)-O(10)   | 85.6(4)  | O(11A)#1-Mo(2)-O(10) | 111.3(3)   | O(8)-Mo(3)-O(11)     | 114.8(4) |
| O(11)-Mo(3)-O(9)      | 132.2(4) | O(8)-Mo(3)-O(7)#2    | 99.8(2)    | O(11)-Mo(3)-O(7)#2   | 84.8(3)  |
| O(11)-Mo(3)-O(9A)     | 155.0(4) | O(9)-Mo(3)-O(11A)    | 152.8(4)   | O(7)#2-Mo(3)-O(11A)  | 99.0(3)  |
| O(9A)-Mo(3)-O(11A)    | 163.9(3) | O(8)-Mo(3)-O(3)#3    | 92.6(2)    | O(7)#2-Mo(3)-O(3)#3  | 167.1(2) |
| O(8)-Mo(3)-O(10A)     | 158.7(3) | O(9A)-Mo(3)-O(10A)   | 108.6(3)   | O(8)-Mo(3)-O(10)     | 158.6(3) |
| O(10)#3-As(1)-O(10)#1 | 108.9(3) | As(1)-O(5)-Mo(1)#3   | 122.17(14) | As(1)-O(10)-Mo(3)    | 122.8(4) |
| Mo(3)-O(11)-Mo(2)#3   | 155.1(5) | Mo(2)#3-O(11A)-Mo(3) | 120.0(4)   | N(1)#5-Cu(1)-N(1)    | 179.8(5) |

Symmetry transformations used to generate equivalent atoms: #1 -y+1,x-y+1,z; #2 y-1/3,-x+y+1/3,-z+4/3; #3 -x+y,-x+1,z; #4 x-y+2/3,x+1/3,-z+4/3; #5 -x+4/3,-x+y+2/3,-z+7/6

| Compound 2        |            |                    |             |                     |            |
|-------------------|------------|--------------------|-------------|---------------------|------------|
| Ag(1)-N(1)#1      | 2.112(6)   | Ag(1)-N(1)         | 2.112(6)    | Ag(2)-N(3)          | 2.108(6)   |
| Ag(2)-N(3)#2      | 2.108(6)   | Mo(1)-O(10)        | 1.652(3)    | Mo(1)-O(9)          | 1.786(7)   |
| Mo(1)-O(3)        | 1.883(3)   | Mo(1)-O(8)         | 1.995(6)    | Mo(1)-O(6)#3        | 2.037(4)   |
| Mo(1)-O(7)        | 2.318(5)   | Mo(2)-O(2)         | 1.685(4)    | Mo(2)-O(4)          | 1.799(3)   |
| Mo(2)-O(1)        | 1.898(3)   | Mo(2)-O(3)         | 1.989(3)    | Mo(2)-O(1)#4        | 2.046(3)   |
| Mo(2)-O(11)       | 2.360(3)   | Mo(3)-O(5)         | 1.666(4)    | Mo(3)-O(6)          | 1.796(4)   |
| Mo(3)-O(9)#5      | 1.798(7)   | Mo(3)-O(8)         | 2.063(6)    | Mo(3)-O(4)          | 2.127(3)   |
| Mo(3)-O(7)        | 2.289(5)   | As(1)-O(7)         | 1.644(5)    | As(1)-O(11)         | 1.715(5)   |
| O(1)-Mo(2)#5      | 2.046(3)   | O(6)-Mo(1)#6       | 2.037(4)    | O(11)-Mo(2)#4       | 2.360(3)   |
| O(11)-Mo(2)#5     | 2.360(3)   | O(9)-Mo(3)#4       | 1.797(6)    | Ag(1)-O(9A)         | 2.660      |
| Ag(2)-O(5)        | 2.708      |                    |             |                     |            |
| N(1)#1-Ag(1)-N(1) | 176.6(3)   | N(3)-Ag(2)-N(3)#2  | 174.1(4)    | O(10)-Mo(1)-O(9)    | 111.7(3)   |
| O(10)-Mo(1)-O(3)  | 100.87(17) | O(9)-Mo(1)-O(3)    | 90.8(2)     | O(10)-Mo(1)-O(8)    | 92.0(2)    |
| O(9)-Mo(1)-O(8)   | 156.3(3)   | O(3)-Mo(1)-O(8)    | 83.68(19)   | O(10)-Mo(1)-O(6)#3  | 93.70(17)  |
| O(9)-Mo(1)-O(6)#3 | 86.0(2)    | O(3)-Mo(1)-O(6)#3  | 165.24(14)  | O(8)-Mo(1)-O(6)#3   | 93.6(2)    |
| O(10)-Mo(1)-O(7)  | 162.1(2)   | O(9)-Mo(1)-O(7)    | 86.0(3)     | O(6)#3-Mo(1)-O(7)   | 85.16(17)  |
| O(2)-Mo(2)-O(4)   | 104.77(17) | O(2)-Mo(2)-O(1)    | 100.93(17)  | O(4)-Mo(2)-O(1)     | 95.52(15)  |
| O(2)-Mo(2)-O(3)   | 101.32(17) | O(4)-Mo(2)-O(3)    | 88.36(14)   | O(1)-Mo(2)-O(3)     | 155.62(14) |
| O(2)-Mo(2)-O(1)#4 | 96.64(16)  | O(4)-Mo(2)-O(1)#4  | 157.86(14)  | O(1)-Mo(2)-O(1)#4   | 85.7(2)    |
| O(3)-Mo(2)-O(1)#4 | 81.91(13)  | O(2)-Mo(2)-O(11)   | 167.24(17)  | O(4)-Mo(2)-O(11)    | 87.50(14)  |
| O(1)-Mo(2)-O(11)  | 73.98(12)  | O(3)-Mo(2)-O(11)   | 82.17(12)   | O(1)#4-Mo(2)-O(11)  | 71.55(12)  |
| O(5)-Mo(3)-O(6)   | 100.71(18) | O(5)-Mo(3)-O(9)#5  | 111.6(3)    | O(6)-Mo(3)-O(9)#5   | 95.6(3)    |
| O(5)-Mo(3)-O(8)   | 88.4(2)    | O(6)-Mo(3)-O(8)    | 101.4(2)    | O(9)#5-Mo(3)-O(8)   | 150.9(3)   |
| O(5)-Mo(3)-O(4)   | 90.96(16)  | O(6)-Mo(3)-O(4)    | 167.80(14)  | O(9)#5-Mo(3)-O(4)   | 83.2(2)    |
| O(8)-Mo(3)-O(4)   | 75.15(18)  | O(5)-Mo(3)-O(7)    | 156.50(19)v | O(6)-Mo(3)-O(7)     | 92.38(18)  |
| O(9)#5-Mo(3)-O(7) | 86.1(3)    | O(8)-Mo(3)-O(7)v   | 69.8(2)     | O(4)-Mo(3)-O(7)     | 75.42(16)  |
| O(7)#4-As(1)-O(7) | 114.68(14) | O(7)#4-As(1)-O(11) | 103.56(19)  | As(1)-O(11)-Mo(2)#4 | 122.86(11) |

Symmetry transformations used to generate equivalent atoms: #1 x-y+2/3,-y+4/3,-z+5/6; #2 y+2/3,x-2/3,-z+5/6; #3 x-y+1/3,x-1/3,-z+2/3; #4 -y+1,x-y,z; #5 -x+y+1,-x+1,z; #6 y+1/3,-x+y+2/3,-z+2/3

Table S2 Hydrogen bonds information for compounds 1 and 2

| Compound 1            |            |            |            |         |
|-----------------------|------------|------------|------------|---------|
| D-H...A               | d(D...H) Å | d(H...A) Å | d(D...A) Å | ∠(DHA)° |
| N(2) --H(2) ..O(4)    | 0.86       | 2.24       | 2.982(11)  | 144     |
| N(2) --H(2) ..O(3)#1  | 0.86       | 2.54       | 3.198(10)  | 134     |
| N(4) --H(4) ..O(8)    | 0.86       | 2.42       | 3.019(12)  | 127     |
| C(1) --H(1) ..O(9A)#2 | 0.93       | 2.44       | 3.023(14)  | 120     |
| C(1) --H(1) ..O(11)#3 | 0.93       | 2.58       | 3.318(16)  | 136     |
| C(5) --H(5) ..O(6)#4  | 0.93       | 2.44       | 3.279(18)  | 150     |

Symmetry transformations used to generate equivalent atoms: #1 -x+y,1-x,z; #2 4/3-x,2/3-x+y,7/6-z; #3 2/3-x+y,1/3+y,-1/6+z; #4 1+x-y,x,1-z

| Compound 2           |            |            |            |         |
|----------------------|------------|------------|------------|---------|
| D-H...A              | d(D...H) Å | d(H...A) Å | d(D...A) Å | ∠(DHA)° |
| N(4) --H(4)..O(4)    | 0.86       | 2.59       | 3.381(10)  | 153     |
| N(4) --H(4)..O(5)    | 0.86       | 2.48       | 3.105(8)   | 130     |
| C(4) --H(4A)..O(2)   | 0.93       | 2.56       | 3.245(14)  | 130     |
| C(5) --H(5)..O(10)#1 | 0.93       | 2.50       | 3.245(13)  | 137     |

Symmetry transformations used to generate equivalent atoms: #1 2-x,1-y,1-z

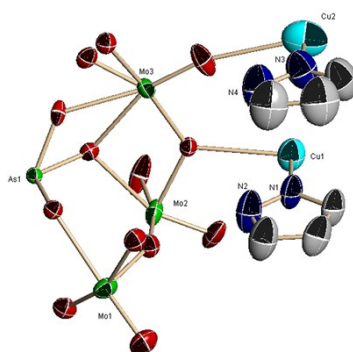

Fig. S1 Asymmetric unit of compound 1 (all of the hydrogen atoms are omitted for clarity)

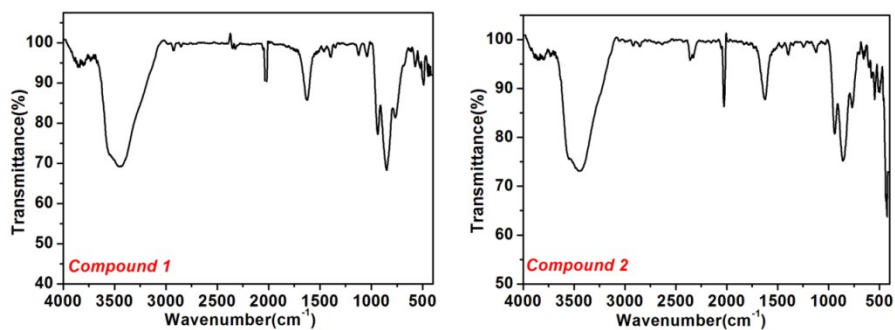

Fig. S2 IR spectra of compounds 1 and 2

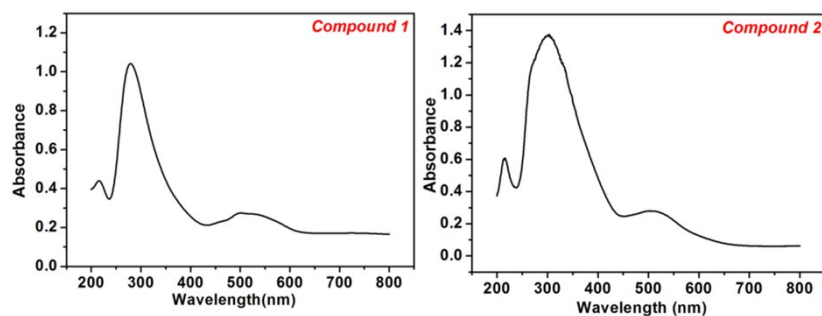

Fig. S3 The UV-vis spectra of compounds 1 and 2 in solid state at room temperature

Compound 1

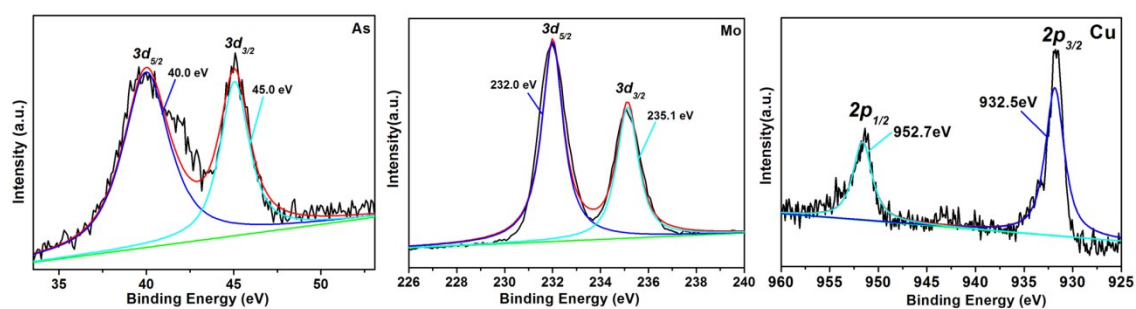

Compound 2

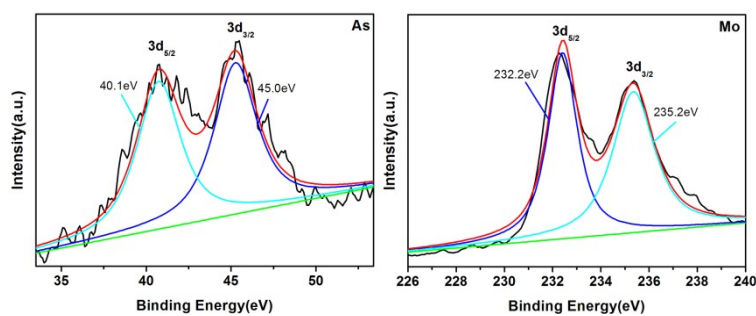

Fig. S4 The XPS spectra of compounds 1 and 2

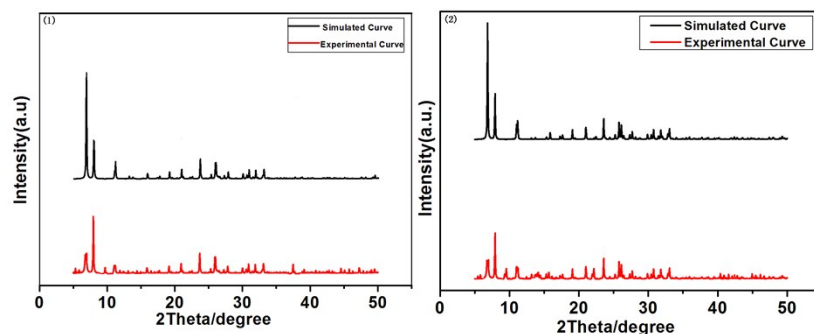

Fig. S5 The PXRD contrast curves of compounds 1 and 2

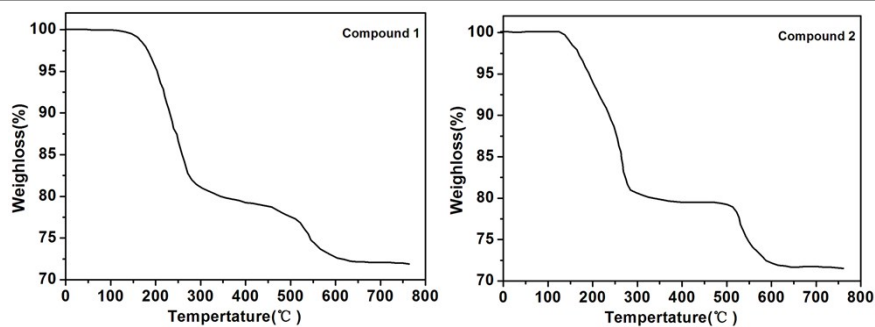

Fig. S6 TG curves of compounds 1 and 2

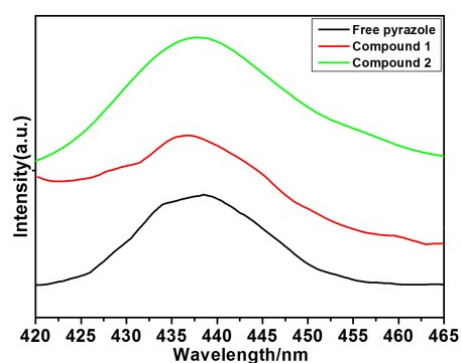

Fig. S7 Fluorescence spectra of compounds 1 and 2 in the solid state at room temperature

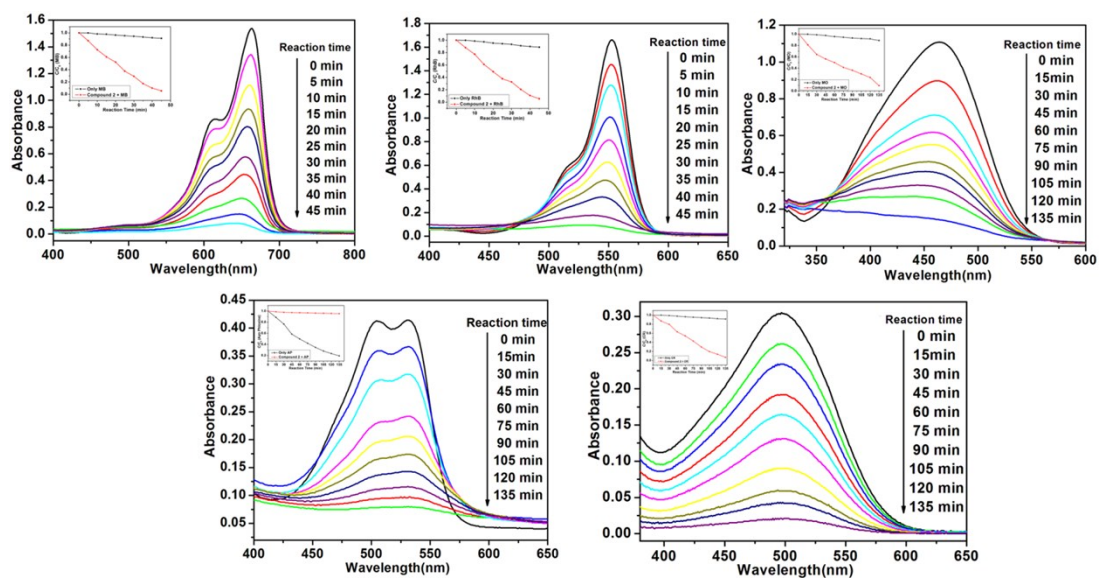

Fig. S8 UV-vis absorption spectra of the MB, RhB, MO, AP, and CR solutions during the decomposition reaction under UV irradiation in the presence of compound 2 (insets) Absorption spectra of the five dyes solution during the decomposition reaction under UV irradiation in the presence of compound 2

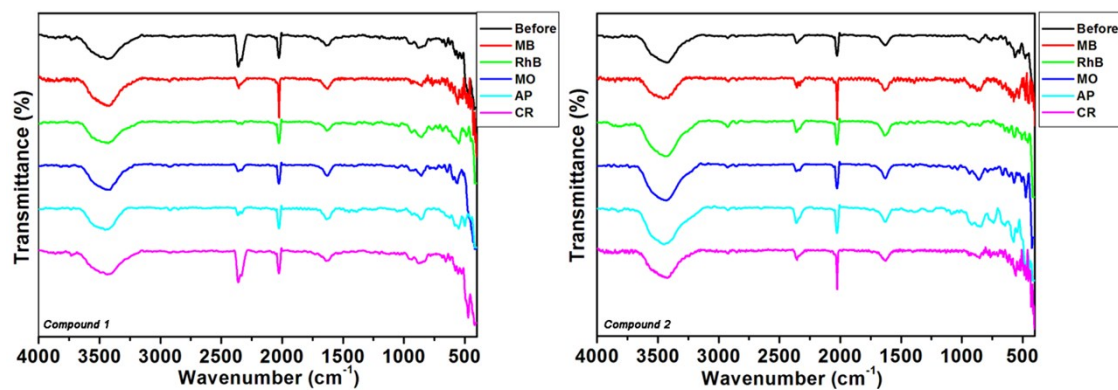

Fig. S9 The IR spectra of catalyst 1 and 2 before and after cycle reaction

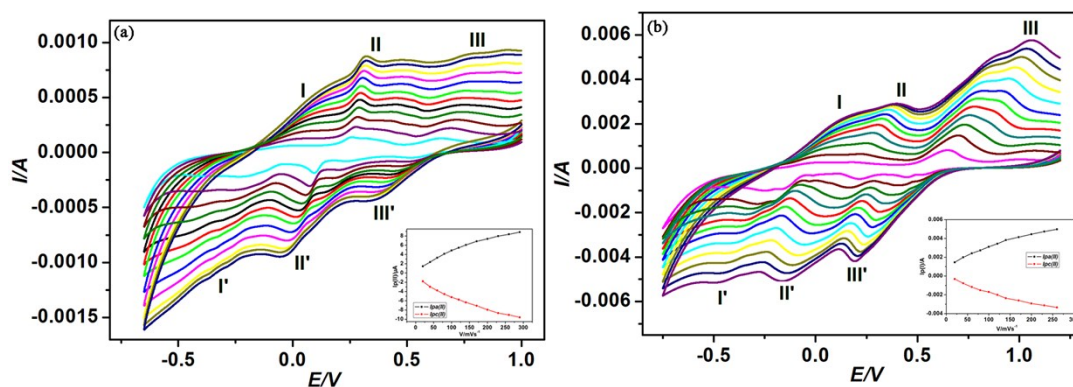

Fig. S10 Cyclic voltammograms of (a) 1-CPE and (b) 2-CPE rates (from inner to outer: 20, 40, 60, 80, 100, 120, 140, 170, 200, 230, 260, 290 mV s<sup>-1</sup>). Potentials vs. SCE. (Insert plots: The dependence of anodic peak II current on scan rates.)
